# Supplementary material
Source: Springer Nature journal article supplement (http://www.springermedizin.de/resource/supplementary/12968_2011_2617_MOESM1_ESM.pdf/9582342)

Haste imaging

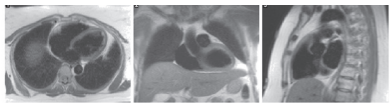

Cine imaging

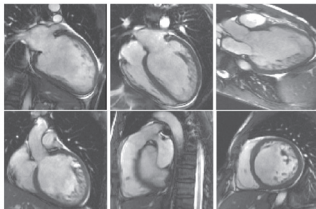

STIR-imaging

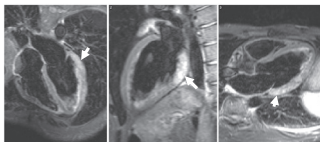

Early gadolinium

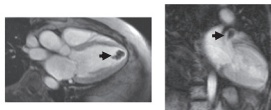

Late gadolinium

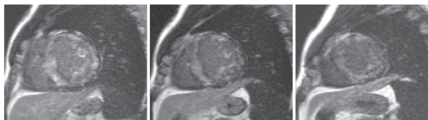

Supplement: MOESM1 [file 9582342]
